# Supplementary material for: Hierarchically order porous lotus shaped nano-structured MnO2 through MnCO3: chelate mediated growth and shape dependent improved catalytic activity
Source: Royal Society of Chemistry journal article supplement (doi:10.1039/c3ta11440f), 2013-01-01
Supplement: c3ta11440f.pdf [file c3ta11440f.pdf]

## Electronic Supplementary Information (ESI)

### Hierarchically order porous Lotus shaped nano-structured $\text{MnO}_2$ through $\text{MnCO}_3$ : Chelation Mediated growth and shape dependent improved catalytic activity

*Provas Pal, Sandip Pahari, Arnab Kanti Giri, Sagar Pal, Hari C. Bajaj, Asit Baran Panda \**

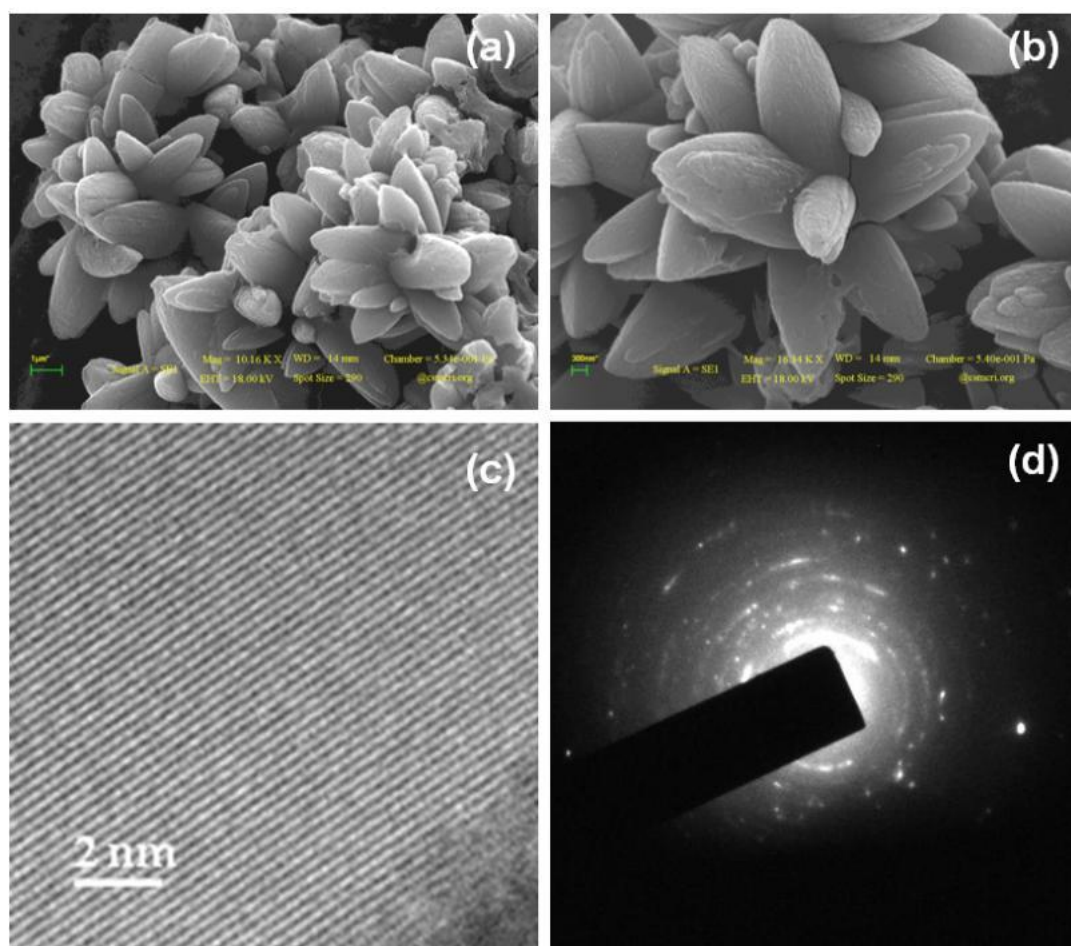

**Fig. S1.** SEM (a, b), HR-TEM (c) images and electron diffraction pattern (d) of lotus shaped  $\text{MnO}_2$  calcined at 350 °C/6h.

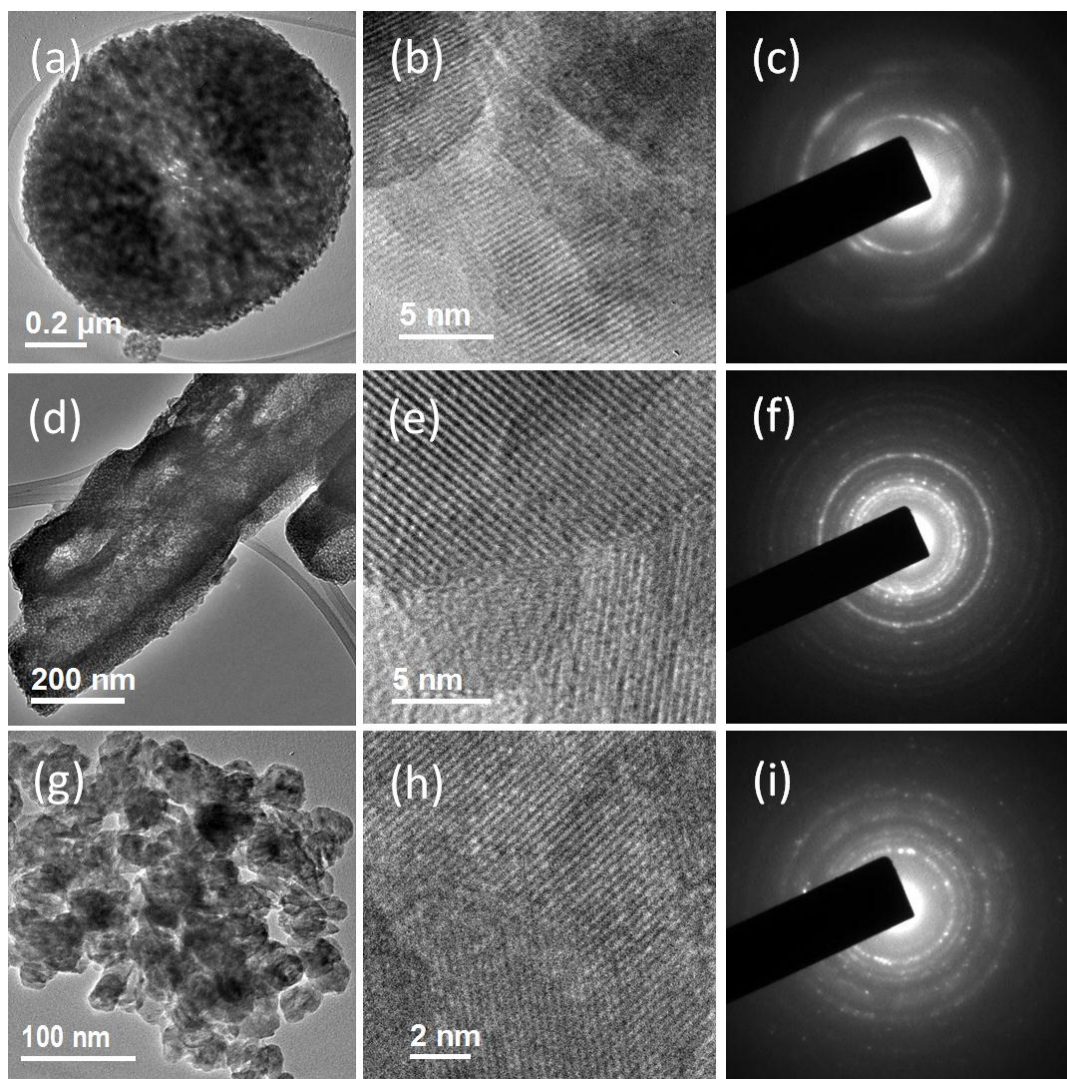

**Fig. S2.** TEM, HR-TEM images and electron diffraction patterns of Sphere (a, b, c), rod (d, e, f) and agglomerated (g, h, i)  $\text{MnO}_2$  particles synthesized in presence of oxalic acid, tartaric acid and EDTA, respectively, followed by calcination at  $350^\circ\text{C}/6\text{h}$ .

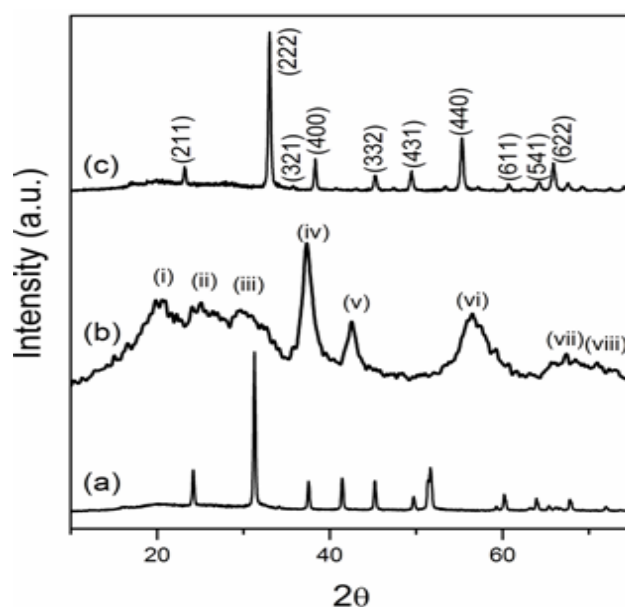

**Fig. S3.** X-ray diffraction of parental lotus shaped (a)  $\text{MnCO}_3$ , (b)  $\gamma\text{-MnO}_2$  and (c)  $\text{Mn}_2\text{O}_3$  calcine at  $600^\circ\text{C}/6\text{h}$ .

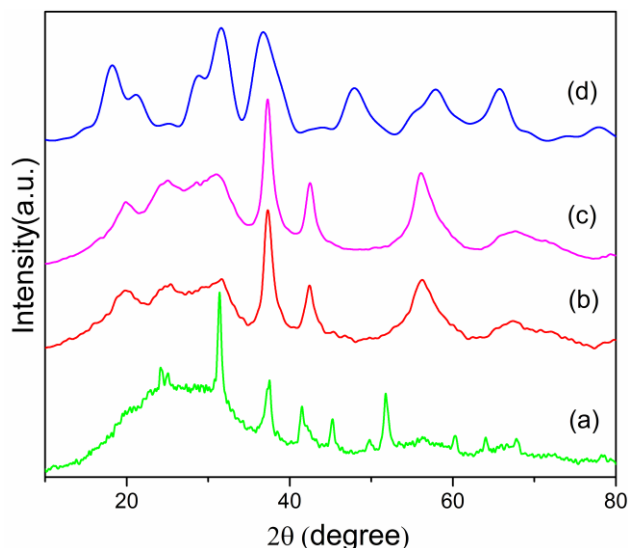

**Fig. S4.** X-ray diffraction of (a) agglomerated, (b) Lotus, (c) Spherical and (d) Rod shaped  $\text{MnO}_2$ .

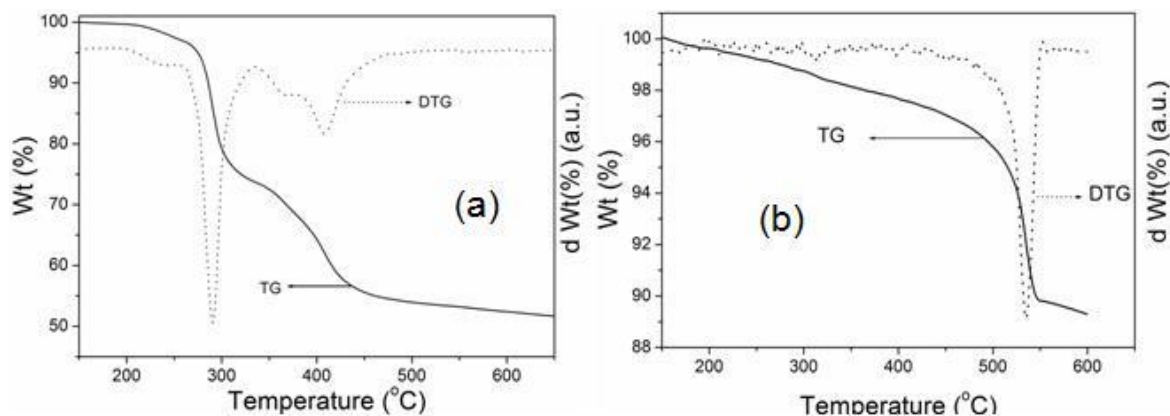

**Fig. S5.** TG curves of parental lotus shaped  $\text{MnCO}_3$  as well as the  $\text{MnO}_2$  calcined at 350°C for 6h.

Thermo-gravimetric analysis was performed, to understand the exact thermal effect on the as-synthesized  $\text{MnCO}_3$ . From the TGA and DTG curve of the as-synthesized  $\text{MnCO}_3$  in air, it is evident that initially the weight loss of ~4-5% in the temperature range of 50 -220 °C can be attributed to the removal of adsorbed water molecule, trapped carbon dioxide, and ammonia from the  $\text{MnCO}_3$  moiety. In the 2<sup>nd</sup> step the major weight loss ~ 30 % in the temperature range of 220-350°C can be assigned to the loss of  $\text{CO}_2$  due to the transformation of  $\text{MnCO}_3$  to tetravalent  $\text{Mn}^{4+}$  oxide ( $\text{MnO}_2$ ).<sup>[1]</sup> The theoretical weight loss value for the transformation of  $\text{MnCO}_3$  to  $\text{MnO}_2$  is 24.34%. The excess weight loss is probably originating from the decomposition of strongly adsorbed citric acid, present even after through washing. Further ~ 15% weight loss observed above 350 °C (350-500 ° C) can be attributed to the reduction of tetravalent  $\text{Mn}^{4+}$  oxide ( $\text{MnO}_2$ ) to  $\text{Mn}_2\text{O}_3$  (9%) and decomposition of trapped citric acid. However, this unrecompensed citric acid remained even after 350°C during continuous heating in TG analysis was fully decomposed even in 350°C on long time (6h) calcinations. This was confirmed by the TG analysis of  $\text{MnO}_2$  calcined at 350°C for 6h step-wise. During TGA of  $\text{MnO}_2$ , total 11% weight loss was observed. In the 11 %, theoretical 9% weight loss is for ( $\text{MnO}_2$ ) to  $\text{Mn}_2\text{O}_3$  transformation and 2% may be for the moisture within 250°C. This experiment confirmed that the synthesized  $\text{MnO}_2$  is carbon free.

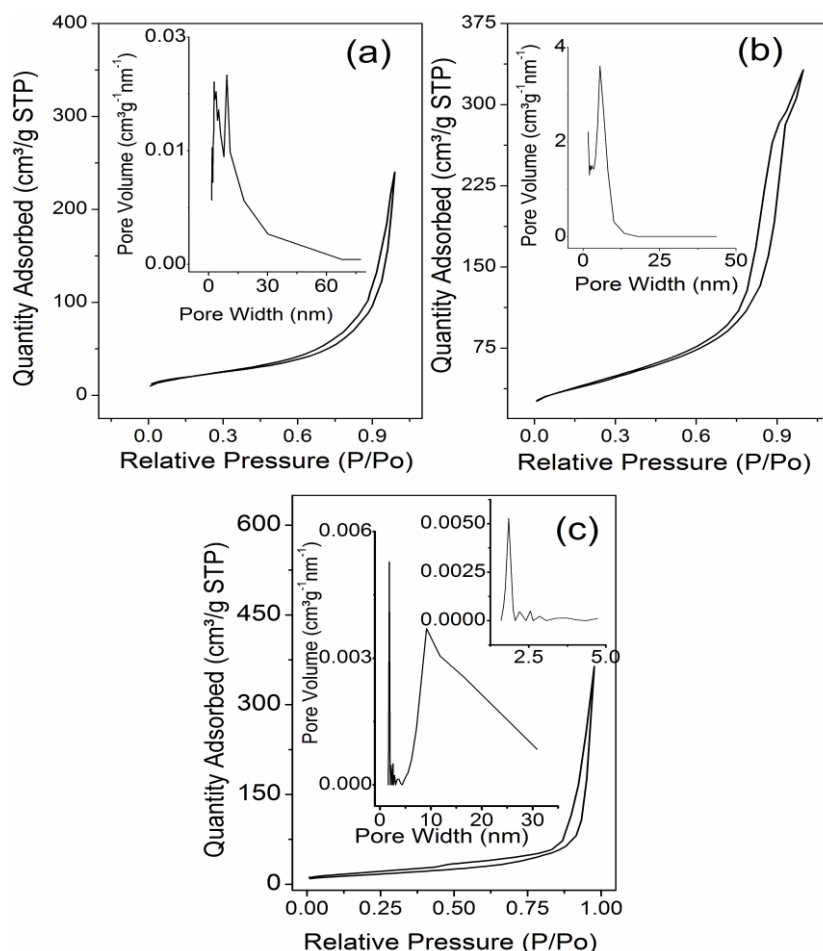

**Fig. S6.** BET Surface Area and pore size distribution curve (inset) rod (a), Sphere (b) and agglomerated (c)  $\text{MnO}_2$  particles synthesized in presence of oxalic acid, tartaric acid and EDTA, respectively, followed by calcination at  $350\text{ }^\circ\text{C}/6\text{h}$  of synthesized  $\text{MnO}_2$  of different shapes,  $\text{Mn}_2\text{O}_3$

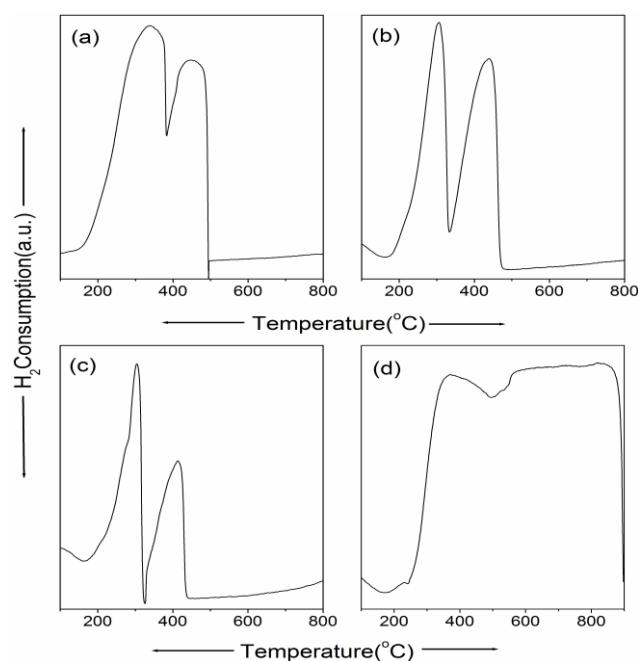

**Fig. S7.**  $\text{H}_2$ -TPR curve of Sphere (a), rod (b) and agglomerated (c)  $\text{MnO}_2$  particles synthesized in presence of oxalic acid, tartaric acid and EDTA, respectively, followed by calcination at  $350\text{ }^\circ\text{C}/6\text{h}$  and commercially available bulk  $\text{MnO}_2$  (d).



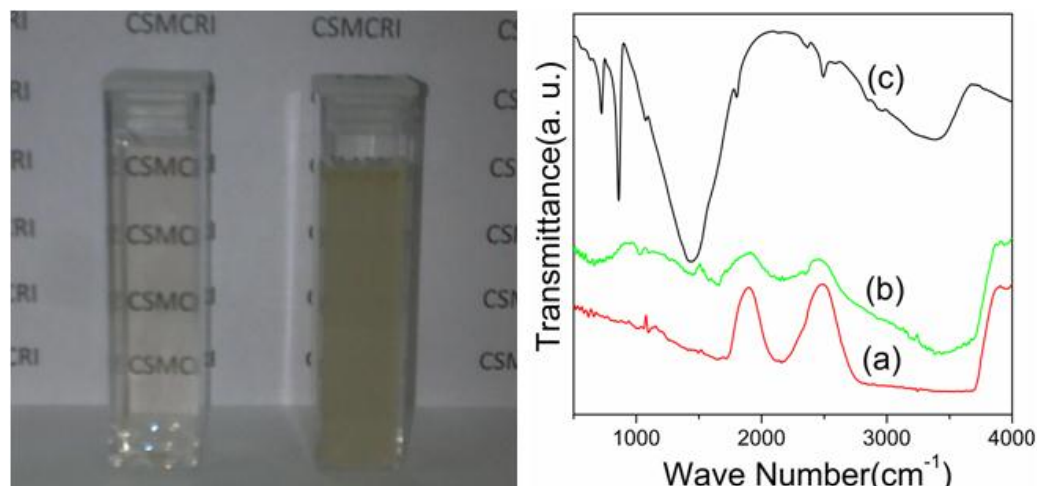

**Fig. S8.** Left column: The photograph of initial clear precursor solution and hazy solution after 1 h. right column: Solution phase IR for detection of formation of  $\text{MnCO}_3$  Capped by citrate ion (a) clear solution, hazy solution (after 1h) and pure  $\text{MnCO}_3$  formed without chelating agent.

Though in solution phase structure and stoichiometry determination is really tuff but 3 CA are coordinated to  $\text{MnCO}_3$  and is capped nucleated  $\text{MnCO}_3$  Nano blocks by carboxyl groups in different orientation. This interaction of CAs and  $\text{MnCO}_3$  Blocks has been proven by FT-IR study. The peak of hydroxyl groups of nano- $\text{MnCO}_3$  down shifts in clear solution of  $\text{MnCO}_3$ -Citrate Solution and after 1h when some  $\text{MnCO}_3$  precipitate then two peaks has observe one more down shifted and another at higher region due to low concentrated with higher binding strength of hydroxyl group of nano- $\text{MnCO}_3$  and pure hydroxyl group respectively. Also the band at  $1725\text{ cm}^{-1}$  shifted to  $1665\text{ cm}^{-1}$  probably is caused by  $\nu(\text{C=O})$  that is shifted by intermolecular hydrogen bonds to lower wave number when after 1h some  $\text{MnCO}_3$  precipitated out. Also a comparison of this spectrum with that of the citrate adsorbed on nano- $\text{MnCO}_3$  revealed a widening and a shift to higher frequencies of  $\nu(\text{COO}^-)$  at  $1574\text{ cm}^{-1}$  for the clear solution of  $\text{MnCO}_3$ -Citrate solution.

Lastly a broad peak at  $1430\text{ cm}^{-1}$  indicates for  $\nu(\text{C-O})$  of  $\text{MnCO}_3$ . Which are presents both the spectra of  $\text{MnCO}_3$ -Citrate solution (clear and hazy).

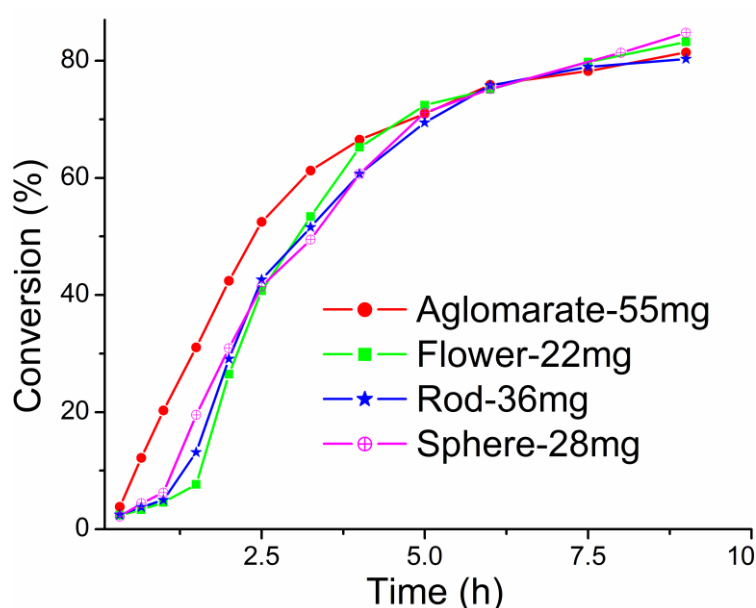

**Fig. S9.** Reaction profiles of  $\alpha$ -pinene oxidation using molecular oxygen of four different shapes catalysts keeping constant  $S_{\text{BET}}$  and at other condition. All the data points are within the error range of  $\pm 2$ .

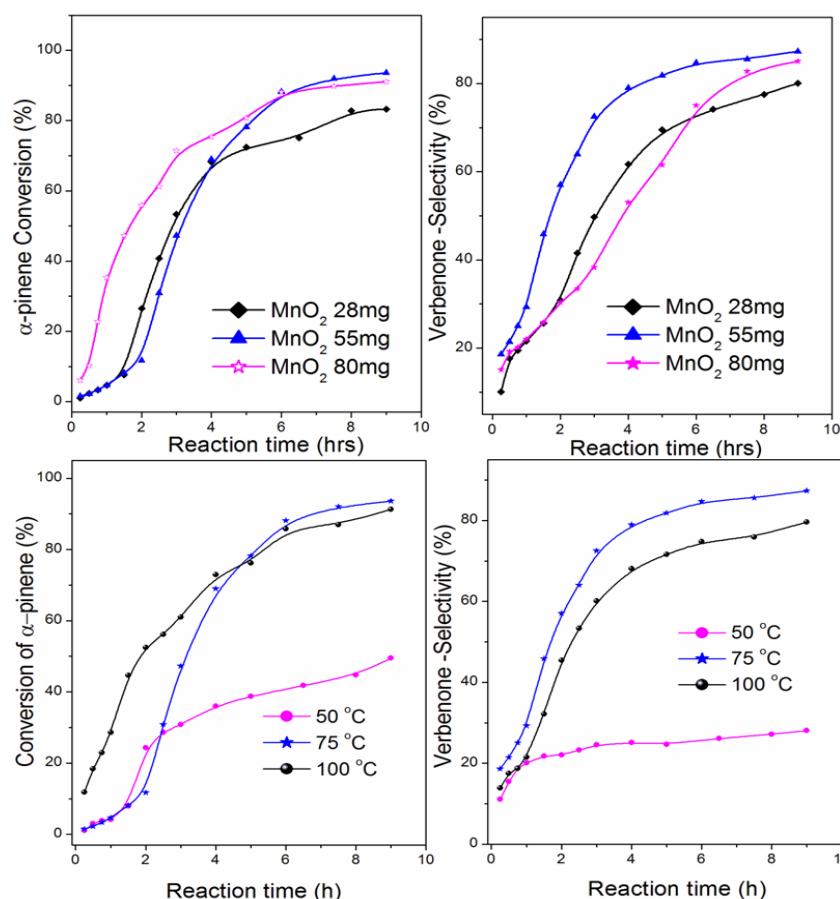

**Fig. S10.** Reaction profiles of  $\alpha$ -pinene oxidation using lotus shaped  $\text{MnO}_2$  as catalyst and molecular oxygen in 35.2 mmol  $\alpha$ -Pinene (4 ml) with varying amount of catalyst and reaction temperature. All the data points are within the error range of  $\pm 3$ .

It was observed that 55 mg of catalyst for 4 ml  $\alpha$ -Pinene and 75 °C is the optimized reaction condition with respect to conversion and selectivity and in the optimized reaction conditions. Maximum 94% conversion of  $\alpha$ -pinene with 87% selectivity of verbenone was observed. The conversion was decreased with reduced amount of catalyst, in the same time the selectivity of verbenone was also decreased with enhanced verbenol selectivity. With further increase in the catalyst amount, initial reaction rate was increased reasonably but after 8h the conversion was almost same as reaction performed with optimized amount of catalyst. Likewise, at lower temperature, the conversion as well as selectivity of verbenone was very less, whereas at higher temperature the initial reaction rate was high but after 8 h maximum conversion was observed in short period (similar to high catalyst loading). However, high temperature affects the selectivity of verbenone and it decreased at higher temperature.

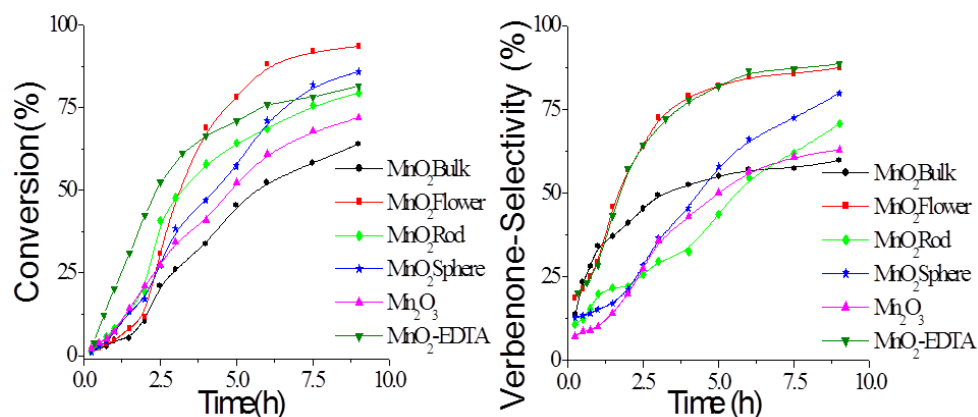

**Fig. S11.** Reaction profiles of  $\alpha$ -pinene oxidation using molecular oxygen in 35.2 mmol  $\alpha$ -Pinene (4 ml), 55 mg catalyst with varying shapes and at 75 °C. All the data points are within the error range of  $\pm 3$ .

The catalyst showed a similar profile with more than 60%  $\alpha$ -pinene conversion. All the performed reaction ended with 6 probable compounds with varying selectivity. However, all the catalyst resulted  $>50\%$  selectivity of verbenone. The synthesized lotus shaped  $\text{MnO}_2$  showed much superior catalytic activity than that of bulk  $\text{MnO}_2$ , with respect to conversion as well as selectivity of verbenone. Further, the conversion and selectivity of lotus shaped  $\text{MnO}_2$  was better than that of  $\text{MnO}_2$  spheres as well lotus shaped  $\text{Mn}_2\text{O}_3$ . Lotus shaped  $\text{MnO}_2$  showed superior activity most probably due to it high surface area as well as much more accessible surface reactant originating from its shape, and presence of more low temperature labile oxygen species.

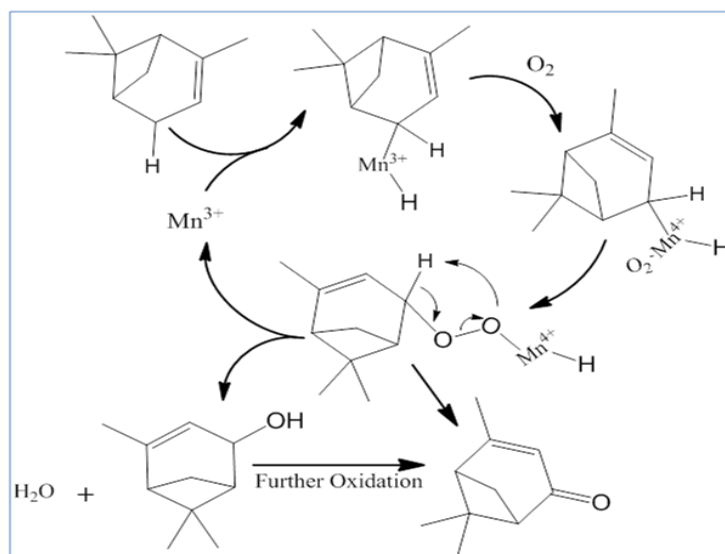

**Scheme S1** Proposed probable reaction mechanism.

Manganese oxide structures can form mixed-valent octahedral molecular sieves. Suib et. al describe that the active sites of OMS may be derived from  $\text{Mn}^{3+}$  ions in tunnel sites in the materials.<sup>3</sup>. The form of active oxygen is presumably the  $\text{O}^{2-}$  ion; this indicates a

simultaneous transfer of two electrons and not a stepwise electron donation. This prediction also supports our results that oxidation reaction proceeds in presence of radical trapper.<sup>4</sup>

**Table S1.** Catalytic activity comparison of the synthesized lotus shaped MnO<sub>2</sub> with other reported catalysts for oxidation of  $\alpha$ -pinene.

| Sr. No   | Catalyst                                  | Oxidant              | Conversion (%) | Major products       | Selectivity (%) | Yields (%) <sup>a</sup> | Ref. <sup>b</sup>   |
|----------|-------------------------------------------|----------------------|----------------|----------------------|-----------------|-------------------------|---------------------|
| <b>1</b> | <b>MnO<sub>2</sub>-lotus</b>              | <b>O<sub>2</sub></b> | <b>94</b>      | <b>Verbenone</b>     | <b>87</b>       | <b>81</b>               | <b>Present work</b> |
| 2        | Co(OAc) <sub>2</sub>                      | O <sub>2</sub>       | 80             | Verbenyl acetate     | 29.5            | 23                      | 5                   |
| 3        | CuI                                       | TBHP(Air)            | 98             | Verbenone            | 36              | 35                      | 6                   |
| 4        | CoCl <sub>2</sub> ,                       | O <sub>2</sub>       | 84             | Verbenone            | 39              | 32                      | 7                   |
| 5        | Co <sup>2+</sup> -zeolite                 | O <sub>2</sub>       | 47             | Epoxide              | 61              | 28                      | 8                   |
| 6        | Ti-HMS                                    | TBHP                 | 30             | campholenic aldehyde | 80              | 24                      | 9                   |
| 7        | Ru/Co-zeolite                             | Peroxide             | 75             | Epoxide              | 35              | 26                      | 10                  |
| 8        | NaOH                                      | O <sub>2</sub>       | 45             | Verbenol             | 47              | 21                      | 11                  |
| 9        | Cr-AlPO-5                                 | TBHP                 | 85             | Verbenone            | 77              | 65                      | 12                  |
| 10       | Cytochrome P450cam                        | O <sub>2</sub>       | 70             | Verbenone            | 86              | 60                      | 13                  |
| 11       | Co <sup>3+</sup> cubane-mSiO <sub>2</sub> | O <sub>2</sub>       | 81.5           | Epoxide              | 50.1            | 40                      | 14                  |
| 12       | Cr(CO) <sub>6</sub>                       | TBHP                 | 98             | Verbenone            | 68              | 66                      | 15                  |
| 13       | Co <sub>3</sub> O <sub>4</sub>            | O <sub>2</sub>       | 76             | Epoxide              | 84              | 63                      | 16                  |

<sup>a</sup> The mentioned yields are theoretical yields calculated from conversion and selectivity; <sup>b</sup> all the catalytic results of respective catalysts mentioned from Sr. No. 2-13 are literature reported results.

Catalyst used in Sr no. 2,3,4,8,12 are homogeneous and rest are heterogeneous. In the used heterogeneous catalysts only Cr-AlPO-5 (Sr. No 9) resulted both the conversion and selectivity of >80%. Still its theoretical yield is much less (65%) than that of synthesized lotus shaped MnO<sub>2</sub> (81%). Moreover, use of toxic Cr in catalyst and TBHP as oxidant makes the procedure non-viable.

#### Reference:

- 1 L. Wang, F. Tang, K. Ozawa, Z-G. Chen, A. Mukherj, Y. Zhu, J. Zou, H-M. Cheng and G. Q. Lu, *Angew. Chem. Int. Ed.* **2009**, 48, 7048.
- 2 S. J. Gregg and K. S. W. Sing, Adsorption, Surface Area and Porosity; Academic Press: London, **1982**.
- 3 Y-C Son, V D. Makwana, A R. Howell and S L. Suib *Angew. Chem. Int. Ed.* 2001, **40**, 4280.
- 4 D. Shevela, S. Koroidov, M. M. Najafpour, J. Messinger and P. Kurz, *Chem. Euro. J.* **2011**, 17, 5415.
- 5 M. d. F. T. Gomes and O. A. C. Antunes, *J. Mol Catal A: Chem.* **1997**,121, 145.



- 6 B. A. Allal, L. E. Firdoussi, S. Allaoud, A. Karim, Y. Castanet and A. Mortreux, *J. Mol Catal A: Chem.* **2003**, 200, 177.
- 7 M. K. Lajunen, M. Myllykoski and J. Asikkala, *J. Mol Catal A: Chem.* **2003**, 198, 223.
- 8 M. V. Patil, M. K. Yadav and R. V. Jasra, *J. Mol Catal A: Chem.* **2007**, 277, 72.
- 9 Y.-W. Suh, N.-K. Kim, W.-S. Ahn and H.-K. Rhee, *J. Mol Catal A: Chem.* **2003**, 198, 309.
- 10 T. Joseph, D. P. Sawant, C.S. Gopinath and S.B. Halligudi, *J. Mol Catal A: Chem.* **2002**, 184, 289.
- 11 J. M. Encinar, F. J. Beltrán and J. M. Frades, *J Chem Tech Biotechnol.* **1994**, 61, 359.
- 12 H. E. B. Lempers and R. A. Sheldon, *Appl. Catal. A: Gen* **1996**, 143, 137.
- 13 S. G. Bell, X. Chen, R. J. Sowden, F. Xu, J. N. Williams, L.-L. Wong and Z. Rao, *J. Am. Chem. Soc.* **2003**, 125, 705.
- 14 R. Chakrabarty, B. K. Das and J. H. Clark, *Green Chem.*, **2007**, 9, 845.
- 15 Z. Yoosuf-Aly, J. A. Faraldos, D. J. Miller and R. K. Allemann, *Chem. Commun.*, **2012**, 48, 7040.
- 16 X.-H. Lu, Q.-H. Xia, D. Zhou, S.-Y. Fang, A.-L. Chen and Y.-L. Dong, *Catal. Commun.*, **2009**, 11, 106.
